# Supplementary material for: Impact of the COVID-19 Pandemic on Clinical Pathways for Non-SARS-CoV-2 Related Diseases in the Lazio Region, Italy
Source: MDPI journal article supplement (doi:10.3390/ijerph19020635), 2022-01-06
Supplement: s1 [file s1]

**Table S1. COVID SURVEY**

The questionnaire consists of eight sections with 37 items. For each criterion there are 5 possible answers: yes, enough, not enough, not at all, and not applicable; each answer is connected to a percentage range (specifically: yes  $\geq 75\%$ ;  $51\% \leq \text{enough} \leq 74\%$ ;  $26\% \leq \text{not enough} \leq 50\%$ ; and not at all  $\leq 25\%$ ), and respondents are asked to indicate the verbal category that comes closest to their position.

| COVID SURVEY |                                                                     |                                                                                                                                              | yes | enough | not enough | Not at all | Not applicable |
|--------------|---------------------------------------------------------------------|----------------------------------------------------------------------------------------------------------------------------------------------|-----|--------|------------|------------|----------------|
| 1            | CONTEXT ANALYSIS                                                    | During the COVID-19 pandemic, did patients accept treatment despite the fear of contagion?                                                   |     |        |            |            |                |
|              |                                                                     | Compared to the same period of the previous year, during the first wave of the pandemic, did the number of accesses remain stable?           |     |        |            |            |                |
|              |                                                                     | Compared to the first wave of the pandemic, did the number of patients undertaking the care pathways remained stable during the second wave? |     |        |            |            |                |
|              |                                                                     | Has the volume of procedures remained stable during first and second waves compared to the same period of the previous year?                 |     |        |            |            |                |
| 2            | PATIENTS ACCESS TO CP/ UO                                           | Do you use a pre-triage module during treatment?                                                                                             |     |        |            |            |                |
|              |                                                                     | Are security measures taken?                                                                                                                 |     |        |            |            |                |
|              |                                                                     | Are social distancing measures being taken?                                                                                                  |     |        |            |            |                |
| 3            | IMPACT ON THE TREATMENT OF NON-COVID PATIENTS IN THE                | Was the start of the treatment within the care pathway guaranteed to the patients anyway?                                                    |     |        |            |            |                |
|              |                                                                     | Have the cancelled visits been rescheduled and recovered?                                                                                    |     |        |            |            |                |
|              |                                                                     | Has remote monitoring been activated for patients who could not interrupt the treatment (telemedicine)?                                      |     |        |            |            |                |
| 4            | IMPACT ON THE TREATMENT OF PATIENTS ALSO SARS COV-2 INFECTED IN THE | Have you treated patients affected by COVID-19 within the care pathway/hospital ward?                                                        |     |        |            |            |                |
|              |                                                                     | If yes or enough: in hospital in COVID wards?                                                                                                |     |        |            |            |                |
|              |                                                                     | If yes or enough: was it in COVID wards with telephone counselling?                                                                          |     |        |            |            |                |
|              |                                                                     | Have the care pathways for COVID and NON_COVID patients been separated?                                                                      |     |        |            |            |                |
| 5            | IMPACT OF THE COVID-19 PANDEMIC ON PATIENT MANAGEMENT               | Have ad hoc organizational solutions been implemented for patient management compared to the pre-pandemic era?                               |     |        |            |            |                |
|              |                                                                     | Has therapeutic continuity been ensured within the pathway care?                                                                             |     |        |            |            |                |
|              |                                                                     | Have technological solutions, such as telemedicine, been adopted for patient follow-up?                                                      |     |        |            |            |                |
|              |                                                                     | Did all hospitalized patients repeat the screening test for SARS-Cov-2 several times during the hospitalization period?                      |     |        |            |            |                |

|   |                                                                            |                                                                                                                                                                                               |  |  |  |  |  |
|---|----------------------------------------------------------------------------|-----------------------------------------------------------------------------------------------------------------------------------------------------------------------------------------------|--|--|--|--|--|
|   |                                                                            | Has the correct use of PPE (personal protective equipment) by healthcare professionals and patients been monitored?                                                                           |  |  |  |  |  |
| 6 | STRUCTURAL AND ORGANIZATIONAL CHANGES OF THE CP/UO                         | Has the care pathway/hospital ward remained unchanged from an organizational point of view?                                                                                                   |  |  |  |  |  |
|   |                                                                            | Were outpatient and/or surgical activities guaranteed?                                                                                                                                        |  |  |  |  |  |
|   |                                                                            | Has the timing of the transition of a patient from one care setting to another within the care pathway/hospital ward been respected?                                                          |  |  |  |  |  |
|   |                                                                            | Have there been multidisciplinary discussions about the patients' health conditions?                                                                                                          |  |  |  |  |  |
|   |                                                                            | Have structural changes been made to encourage social distancing?                                                                                                                             |  |  |  |  |  |
|   |                                                                            | Have the services relating to non-deferrable diseases been guaranteed?                                                                                                                        |  |  |  |  |  |
| 7 | PROCEDURES AND RECOMMENDATIONS FOR HEALTHCARE PROFESSIONALS / USERS        | Have recommendations for the patients been made clear and visible?                                                                                                                            |  |  |  |  |  |
|   |                                                                            | If yes, or enough, have they been respected?                                                                                                                                                  |  |  |  |  |  |
|   |                                                                            | Have recommendations for relatives been made clear and visible?                                                                                                                               |  |  |  |  |  |
|   |                                                                            | If yes, or enough, have they been respected?                                                                                                                                                  |  |  |  |  |  |
|   |                                                                            | Have recommendations for healthcare professionals been made clear and visible?                                                                                                                |  |  |  |  |  |
|   |                                                                            | If yes, or enough, have they been respected?                                                                                                                                                  |  |  |  |  |  |
| 8 | TRAINING, INFORMATION AND MANAGEMENT OF HEALTH WORKERS IN THE PANDEMIC ERA | Have health care workers involved in care pathways/hospital wards been trained on the dressing-doffing PPE procedures?                                                                        |  |  |  |  |  |
|   |                                                                            | Has the exposed health care personnel been periodically subjected to rhino-pharyngeal swabs to evaluate the possible positivity for SARS-CoV-2?                                               |  |  |  |  |  |
|   |                                                                            | Has the staff been equipped with PPE of modulated efficiency with respect to the professional risk to which they have been exposed?                                                           |  |  |  |  |  |
|   |                                                                            | Have dirty paths and clean access paths to clinical departments been organized?                                                                                                               |  |  |  |  |  |
|   |                                                                            | Has the corporate anti-COVID vaccination program been performed using the employee booking portal?                                                                                            |  |  |  |  |  |
|   |                                                                            | In the company/facility, was the anti-COVID19 vaccination campaign preceded by an information campaign on the technical characteristics, methods of setting up and administering the vaccine? |  |  |  |  |  |
