# Supplementary material for: Impact of the COVID-19 Pandemic on Clinical Pathways for Non-SARS-CoV-2 Related Diseases in the Lazio Region, Italy
Source: MDPI journal article supplement (doi:10.3390/ijerph19020635), 2022-01-06
Supplement: s1 [file s1]

## SM1 Statistical analysis

Total score is calculated from the sum of the Likert scale values, where "yes" is equal to 4, "enough" to 3, "not enough" to 2, "not at all" to 1 and "not applicable" to 0.

### CONTEXT ANALYSIS

- During the COVID-19 pandemic, did patients accept treatment despite the fear of contagion?

| Answer choices | Responses (%) | Responses (number) | Responses (score) |
|----------------|---------------|--------------------|-------------------|
| Yes            | 29.2%         | 7                  | $7*4=28$          |
| Enough         | 33.3%         | 8                  | $8*3=24$          |
| Not enough     | 8.3%          | 2                  | $2*2=4$           |
| Not at all     | 20.8%         | 5                  | $5*1=5$           |
| Not applicable | 8.3%          | 2                  | $2*0=0$           |

| Answered | Total score | Mean | Variance | SD   |
|----------|-------------|------|----------|------|
| 24       | 61          | 2.54 | 1.75     | 1.32 |

- Compared to the same period of the previous year, during the first wave of the pandemic, did the number of accesses remain stable?

| Answer choices | Responses (%) | Responses (number) | Responses (score) |
|----------------|---------------|--------------------|-------------------|
| Yes            | 8.3%          | 2                  | $2*4=8$           |
| Enough         | 41.7%         | 10                 | $10*3=30$         |
| Not enough     | 12.5%         | 3                  | $3*2=6$           |
| Not at all     | 37.5%         | 9                  | $9*1=9$           |
| Not applicable | 0%            | 0                  | $0*0=0$           |

| Answered | Total score | Mean | Variance | SD   |
|----------|-------------|------|----------|------|
| 24       | 53          | 2.21 | 1.08     | 1.04 |

- Compared with the the first wave of the pandemic, did the number of patients undertaking the care pathways remained stable during the second wave?

| Answer choices | Responses (%) | Responses (number) | Responses (score) |
|----------------|---------------|--------------------|-------------------|
| Yes            | 62.5%         | 15                 | $15*4=60$         |
| Enough         | 20.8%         | 5                  | $5*3=15$          |
| Not enough     | 12.5%         | 3                  | $3*2=6$           |
| Not at all     | 0%            | 0                  | $0*1=0$           |
| Not applicable | 4.2%          | 1                  | $1*0=0$           |

| Answered | Total score | Mean | Variance | SD   |
|----------|-------------|------|----------|------|
| 24       | 81          | 3.38 | 0.98     | 0.99 |

- Has the volume of procedures remained stable during first and second waves compared to the same period of the previous year?

| Answer choices | Responses (%) | Responses (number) | Responses (score) |
|----------------|---------------|--------------------|-------------------|
| Yes            | 12.5%         | 3                  | 3*4=12            |
| Enough         | 54.2%         | 13                 | 13*3=39           |
| Not enough     | 12.5%         | 3                  | 3*2=6             |
| Not at all     | 12.5%         | 3                  | 3*1=3             |
| Not applicable | 8.3%          | 2                  | 2*0=0             |

| Answered | Total score | Mean | Variance | SD   |
|----------|-------------|------|----------|------|
| 24       | 60          | 2.50 | 1.25     | 1.12 |

#### PATIENTS ACCESS TO CP/ UO

5. Do you use a pre-triage module during treatment?

| Answer choices | Responses (%) | Responses (number) | Responses (score) |
|----------------|---------------|--------------------|-------------------|
| Yes            | 83.3%         | 20                 | 20*4=80           |
| Enough         | 0.0%          | 0                  | 0*3=0             |
| Not enough     | 0.0%          | 0                  | 0*2=0             |
| Not at all     | 12.5%         | 3                  | 3*1=3             |
| Not applicable | 4.2%          | 1                  | 1*0=0             |

| Answered | Total score | Mean | Variance | SD   |
|----------|-------------|------|----------|------|
| 24       | 83          | 3.46 | 1.50     | 1.22 |

6. Are security measures being taken?

| Answer choices | Responses (%) | Responses (number) | Responses (score) |
|----------------|---------------|--------------------|-------------------|
| Yes            | 91.7%         | 22                 | 22*4=88           |
| Enough         | 8.3%          | 2                  | 2*3=6             |
| Not enough     | 0.0%          | 0                  | 0*2=0             |
| Not at all     | 0.0%          | 0                  | 0*1=0             |
| Not applicable | 0.0%          | 0                  | 0*0=0             |

| Answered | Total score | Mean | Variance | SD   |
|----------|-------------|------|----------|------|
| 24       | 94          | 3.92 | 0.08     | 0.28 |

7. Are social distancing measures being taken?

| Answer choices | Responses (%) | Responses (number) | Responses (score) |
|----------------|---------------|--------------------|-------------------|
| Yes            | 79.2%         | 19                 | 19*4=76           |
| Enough         | 16.7%         | 4                  | 4*3=12            |
| Not enough     | 0.0%          | 0                  | 0*2=0             |
| Not at all     | 4.2%          | 1                  | 1*1=1             |
| Not applicable | 0.0%          | 0                  | 0*0=0             |

| Answered | Total score | Mean | Variance | SD   |
|----------|-------------|------|----------|------|
| 24       | 89          | 3.71 | 0.46     | 0.68 |

## IMPACT ON ACCESS TO CPs FOR NO-COVID PATIENTS

8. Was the start of the treatment within the care pathway guaranteed to the patients anyway?

| Answer choices | Responses (%) | Responses (number) | Responses (score) |
|----------------|---------------|--------------------|-------------------|
| Yes            | 66.7%         | 16                 | $16*4=64$         |
| Enough         | 20.8%         | 5                  | $5*3=15$          |
| Not enough     | 4.2%          | 1                  | $1*2=2$           |
| Not at all     | 4.2%          | 1                  | $1*1=1$           |
| Not applicable | 4.2%          | 1                  | $1*0=0$           |

| Answered | Total score | Mean | Variance | SD   |
|----------|-------------|------|----------|------|
| 24       | 82          | 3.42 | 1.08     | 1.04 |

9. Have the cancelled visits been rescheduled and recovered?

| Answer choices | Responses (%) | Responses (number) | Responses (score) |
|----------------|---------------|--------------------|-------------------|
| Yes            | 58.3%         | 14                 | $14*4=56$         |
| Enough         | 16.7%         | 4                  | $4*3=12$          |
| Not enough     | 0.0%          | 0                  | $0*2=0$           |
| Not at all     | 4.2%          | 1                  | $1*1=1$           |
| Not applicable | 20.8%         | 5                  | $5*0=0$           |

| Answered | Total score | Mean | Variance | SD   |
|----------|-------------|------|----------|------|
| 24       | 69          | 2.88 | 2.61     | 1.62 |

10. Has remote monitoring been activated for patients who could not interrupt the treatment (telemedicine)?

| Answer choices | Responses (%) | Responses (number) | Responses (score) |
|----------------|---------------|--------------------|-------------------|
| Yes            | 16.7%         | 4                  | $4*4=16$          |
| Enough         | 41.7%         | 10                 | $10*3=30$         |
| Not enough     | 12.5%         | 3                  | $3*2=6$           |
| Not at all     | 8.3%          | 2                  | $2*1=2$           |
| Not applicable | 20.8%         | 5                  | $5*0=0$           |

| Answered | Total score | Mean | Variance | SD   |
|----------|-------------|------|----------|------|
| 24       | 54          | 2.25 | 1.94     | 1.39 |

# IMPACT ON ACCESS TO CPs FOR PATIENTS ALSO SARS COV-2 INFECTED

11. Have you treated patients affected by COVID-19 within the care pathway/hospital ward?

| Answer choices | Responses (%) | Responses (number) | Responses (score) |
|----------------|---------------|--------------------|-------------------|
| Yes            | 0.0%          | 0                  | 0*4=0             |
| Enough         | 8.3%          | 2                  | 2*3=6             |
| Not enough     | 12.5%         | 3                  | 3*2=6             |
| Not at all     | 54.2%         | 13                 | 13*1=13           |
| Not applicable | 25.0%         | 6                  | 0*0=0             |

| Answered | Total score | Mean | Variance | SD   |
|----------|-------------|------|----------|------|
| 24       | 25          | 1.04 | 0.71     | 0.84 |

12. If yes or enough: was it inside the hospital in COVID wards?

| Answer choices | Responses (%) | Responses (number) | Responses (score) |
|----------------|---------------|--------------------|-------------------|
| Yes            | 0.0%          | 0                  | 0*4=0             |
| Enough         | 0.0%          | 0                  | 0*3=0             |
| Not enough     | 4.2%          | 1                  | 1*2=2             |
| Not at all     | 12.5%         | 3                  | 3*1=3             |
| Not applicable | 83.3%         | 20                 | 20*0=0            |

| Answered | Total score | Mean | Variance | SD   |
|----------|-------------|------|----------|------|
| 24       | 5           | 0.21 | 0.25     | 0.50 |

13. If yes or enough: was it in COVID wards with telephone counselling?

| Answer choices | Responses (%) | Responses (number) | Responses (score) |
|----------------|---------------|--------------------|-------------------|
| Yes            | 0.0%          | 0                  | 0*4=0             |
| Enough         | 0.0%          | 0                  | 0*3=0             |
| Not enough     | 8.3%          | 2                  | 2*2=4             |
| Not at all     | 12.5%         | 3                  | 3*1=3             |
| Not applicable | 79.2%         | 19                 | 19*0=0            |

| Answered | Total score | Mean | Variance | SD   |
|----------|-------------|------|----------|------|
| 24       | 7           | 0.29 | 0.37     | 0.61 |

14. Have the care pathways for COVID and NON\_COVID patients been separated?

| Answer choices | Responses (%) | Responses (number) | Responses (score) |
|----------------|---------------|--------------------|-------------------|
| Yes            | 50.0%         | 12                 | 12*4=48           |
| Enough         | 4.2%          | 1                  | 1*3=3             |
| Not enough     | 0.0%          | 0                  | 0*2=0             |
| Not at all     | 8.3%          | 2                  | 2*1=2             |
| Not applicable | 37.5%         | 9                  | 9*0=0             |

| <i>Answered</i> | <i>Total score</i> | <i>Mean</i> | <i>Variance</i> | <i>SD</i> |
|-----------------|--------------------|-------------|-----------------|-----------|
| 24              | 53                 | 2.21        | 3.58            | 1.89      |

## IMPACT OF THE COVID-19 PANDEMIC ON PATIENT MANAGEMENT

15. Have ad hoc organizational solutions been implemented for patient management compared to the pre-pandemic era?

| <i>Answer choices</i> | <i>Responses (%)</i> | <i>Responses (number)</i> | <i>Responses (score)</i> |
|-----------------------|----------------------|---------------------------|--------------------------|
| <i>Yes</i>            | 87.5%                | 21                        | 21*4=84                  |
| <i>Enough</i>         | 8.3%                 | 2                         | 2*3=6                    |
| <i>Not enough</i>     | 0.0%                 | 0                         | 0*2=0                    |
| <i>Not at all</i>     | 4.2%                 | 1                         | 1*1=1                    |
| <i>Not applicable</i> | 0.0%                 | 0                         | 0*0=0                    |

| <i>Answered</i> | <i>Total score</i> | <i>Mean</i> | <i>Variance</i> | <i>SD</i> |
|-----------------|--------------------|-------------|-----------------|-----------|
| 24              | 91                 | 3.79        | 0.41            | 0.64      |

16. Has therapeutic continuity been ensured within the pathway care?

| <i>Answer choices</i> | <i>Responses (%)</i> | <i>Responses (number)</i> | <i>Responses (score)</i> |
|-----------------------|----------------------|---------------------------|--------------------------|
| <i>Yes</i>            | 83.3%                | 20                        | 20*4=80                  |
| <i>Enough</i>         | 16.7%                | 4                         | 4*3=12                   |
| <i>Not enough</i>     | 0.0%                 | 0                         | 0*2=0                    |
| <i>Not at all</i>     | 0.0%                 | 0                         | 0*1=0                    |
| <i>Not applicable</i> | 0.0%                 | 0                         | 0*0=0                    |

| <i>Answered</i> | <i>Total score</i> | <i>Mean</i> | <i>Variance</i> | <i>SD</i> |
|-----------------|--------------------|-------------|-----------------|-----------|
| 24              | 92                 | 3.83        | 0.14            | 0.37      |

17. Have technological solutions, such as telemedicine, been adopted for patient follow-up?

| <i>Answer choices</i> | <i>Responses (%)</i> | <i>Responses (number)</i> | <i>Responses (score)</i> |
|-----------------------|----------------------|---------------------------|--------------------------|
| <i>Yes</i>            | 20.8%                | 5                         | 5*4=20                   |
| <i>Enough</i>         | 33.3%                | 8                         | 8*3=24                   |
| <i>Not enough</i>     | 16.7%                | 4                         | 4*2=8                    |
| <i>Not at all</i>     | 8.3%                 | 2                         | 2*1=2                    |
| <i>Not applicable</i> | 20.8%                | 5                         | 5*0=0                    |

| <i>Answered</i> | <i>Total score</i> | <i>Mean</i> | <i>Variance</i> | <i>SD</i> |
|-----------------|--------------------|-------------|-----------------|-----------|
| 24              | 54                 | 2.25        | 2.02            | 1.42      |

18. Did all hospitalized patients repeat the screening test for SARS-Cov-2 several times during the hospitalization period?

| Answer choices | Responses (%) | Responses (number) | Responses (score) |
|----------------|---------------|--------------------|-------------------|
| Yes            | 45.8%         | 11                 | 11*4=44           |
| Enough         | 0.0%          | 0                  | 0*3=0             |
| Not enough     | 4.2%          | 1                  | 1*2=2             |
| Not at all     | 4.2%          | 1                  | 1*1=1             |
| Not applicable | 45.8%         | 11                 | 11*0=0            |

| Answered | Total score | Mean | Variance | SD   |
|----------|-------------|------|----------|------|
| 24       | 47          | 1.96 | 3.71     | 1.93 |

19. Has the correct use of PPE (personal protective equipment) by healthcare professionals and patients been monitored?

| Answer choices | Responses (%) | Responses (number) | Responses (score) |
|----------------|---------------|--------------------|-------------------|
| Yes            | 91.7%         | 22                 | 22*4=88           |
| Enough         | 0.0%          | 0                  | 0*3=0             |
| Not enough     | 0.0%          | 0                  | 0*2=0             |
| Not at all     | 4.2%          | 1                  | 1*1=1             |
| Not applicable | 4.2%          | 1                  | 1*0=0             |

| Answered | Total score | Mean | Variance | SD   |
|----------|-------------|------|----------|------|
| 24       | 89          | 3.71 | 0.96     | 0.98 |

## STRUCTURAL AND ORGANIZATIONAL CHANGES OF THE CP/UO

20. Has the care pathway/hospital ward remained unchanged from an organizational point of view?

| Answer choices | Responses (%) | Responses (number) | Responses (score) |
|----------------|---------------|--------------------|-------------------|
| Yes            | 41.7%         | 10                 | 10*4=40           |
| Enough         | 37.5%         | 9                  | 9*3=27            |
| Not enough     | 8.3%          | 2                  | 2*2=4             |
| Not at all     | 4.2%          | 1                  | 1*1=1             |
| Not applicable | 8.3%          | 2                  | 2*0=0             |

| Answered | Total score | Mean | Variance | SD   |
|----------|-------------|------|----------|------|
| 24       | 72          | 3.00 | 1.19     | 1.40 |

21. Were outpatient and/or surgical activities guaranteed?

| Answer choices | Responses (%) | Responses (number) | Responses (score) |
|----------------|---------------|--------------------|-------------------|
| Yes            | 58.3%         | 14                 | 14*4=56           |
| Enough         | 25.0%         | 6                  | 6*3=18            |
| Not enough     | 0.0%          | 0                  | 0*2=0             |
| Not at all     | 4.2%          | 1                  | 1*1=1             |
| Not applicable | 12.5%         | 3                  | 3*0=0             |

| <i>Answered</i> | <i>Total score</i> | <i>Mean</i> | <i>Variance</i> | <i>SD</i> |
|-----------------|--------------------|-------------|-----------------|-----------|
| 24              | 75                 | 3.13        | 1.86            | 1.36      |

22. Has the timing of the transition of a patient from one care setting to another within the care pathway/hospital ward been respected?

| <i>Answer choices</i> | <i>Responses (%)</i> | <i>Responses (number)</i> | <i>Responses (score)</i> |
|-----------------------|----------------------|---------------------------|--------------------------|
| <i>Yes</i>            | 37.5%                | 9                         | $9*4=36$                 |
| <i>Enough</i>         | 41.7%                | 10                        | $10*3=30$                |
| <i>Not enough</i>     | 0.0%                 | 0                         | $0*2=0$                  |
| <i>Not at all</i>     | 4.2%                 | 1                         | $1*1=1$                  |
| <i>Not applicable</i> | 16.7%                | 4                         | $4*0=0$                  |

| <i>Answered</i> | <i>Total score</i> | <i>Mean</i> | <i>Variance</i> | <i>SD</i> |
|-----------------|--------------------|-------------|-----------------|-----------|
| 24              | 67                 | 2.79        | 2.00            | 1.41      |

23. Have there been multidisciplinary discussions about the patients' health conditions?

| <i>Answer choices</i> | <i>Responses (%)</i> | <i>Responses (number)</i> | <i>Responses (score)</i> |
|-----------------------|----------------------|---------------------------|--------------------------|
| <i>Yes</i>            | 50.0%                | 12                        | $12*4=48$                |
| <i>Enough</i>         | 25.0%                | 6                         | $6*3=18$                 |
| <i>Not enough</i>     | 8.3%                 | 2                         | $2*2=4$                  |
| <i>Not at all</i>     | 0.0%                 | 0                         | $0*1=0$                  |
| <i>Not applicable</i> | 16.7%                | 4                         | $4*0=0$                  |

| <i>Answered</i> | <i>Total score</i> | <i>Mean</i> | <i>Variance</i> | <i>SD</i> |
|-----------------|--------------------|-------------|-----------------|-----------|
| 24              | 70                 | 2.92        | 2.08            | 1.44      |

24. Have structural changes been made to encourage social distancing?

| <i>Answer choices</i> | <i>Responses (%)</i> | <i>Responses (number)</i> | <i>Responses (score)</i> |
|-----------------------|----------------------|---------------------------|--------------------------|
| <i>Yes</i>            | 70.8%                | 17                        | $17*4=68$                |
| <i>Enough</i>         | 16.7%                | 4                         | $4*3=12$                 |
| <i>Not enough</i>     | 4.2%                 | 1                         | $1*2=2$                  |
| <i>Not at all</i>     | 4.2%                 | 1                         | $1*1=1$                  |
| <i>Not applicable</i> | 4.2%                 | 1                         | $1*0=0$                  |

| <i>Answered</i> | <i>Total score</i> | <i>Mean</i> | <i>Variance</i> | <i>SD</i> |
|-----------------|--------------------|-------------|-----------------|-----------|
| 24              | 83                 | 3.46        | 1.08            | 1.04      |

25. Have the services relating to non-deferrable diseases been guaranteed?

| Answer choices | Responses (%) | Responses (number) | Responses (score) |
|----------------|---------------|--------------------|-------------------|
| Yes            | 83.3%         | 20                 | 20*4=80           |
| Enough         | 8.3%          | 2                  | 2*3=6             |
| Not enough     | 0.0%          | 0                  | 0*2=0             |
| Not at all     | 4.2%          | 1                  | 1*1=1             |
| Not applicable | 4.2%          | 1                  | 1*0=0             |

| Answered | Total score | Mean | Variance | SD   |
|----------|-------------|------|----------|------|
| 24       | 87          | 3.63 | 0.98     | 0.99 |

## PROCEDURES AND RECOMMENDATIONS FOR HEALTHCARE PROFESSIONALS / USERS

26. Have recommendations for the patients been made clear and visible?

| Answer choices | Responses (%) | Responses (number) | Responses (score) |
|----------------|---------------|--------------------|-------------------|
| Yes            | 87.5%         | 21                 | 21*4=84           |
| Enough         | 8.3%          | 2                  | 2*3=6             |
| Not enough     | 0.0%          | 0                  | 0*2=0             |
| Not at all     | 4.2%          | 1                  | 1*1=1             |
| Not applicable | 0.0%          | 0                  | 0*0=0             |

| Answered | Total score | Mean | Variance | SD   |
|----------|-------------|------|----------|------|
| 24       | 91          | 3.79 | 0.41     | 0.64 |

27. If yes, or enough, have they been respected?

| Answer choices | Responses (%) | Responses (number) | Responses (score) |
|----------------|---------------|--------------------|-------------------|
| Yes            | 54.2%         | 13                 | 13*4=52           |
| Enough         | 45.8%         | 11                 | 11*3=33           |
| Not enough     | 0.0%          | 0                  | 0*2=0             |
| Not at all     | 0.0%          | 0                  | 0*1=0             |
| Not applicable | 0.0%          | 0                  | 0*0=0             |

| Answered | Total score | Mean | Variance | SD   |
|----------|-------------|------|----------|------|
| 24       | 85          | 3.54 | 0.25     | 0.50 |

28. Have recommendations for relatives been made clear and visible?

| Answer choices | Responses (%) | Responses (number) | Responses (score) |
|----------------|---------------|--------------------|-------------------|
| Yes            | 91.7%         | 22                 | 22*4=88           |
| Enough         | 4.2%          | 1                  | 1*3=3             |
| Not enough     | 0.0%          | 0                  | 0*2=0             |
| Not at all     | 4.2%          | 1                  | 1*1=1             |
| Not applicable | 0.0%          | 0                  | 0*0=0             |



| <i>Answered</i> | <i>Total score</i> | <i>Mean</i> | <i>Variance</i> | <i>SD</i> |
|-----------------|--------------------|-------------|-----------------|-----------|
| 24              | 92                 | 3.83        | 0.39            | 0.62      |

29. If yes, or enough, have they been respected?

| <i>Answer choices</i> | <i>Responses (%)</i> | <i>Responses (number)</i> | <i>Responses (score)</i> |
|-----------------------|----------------------|---------------------------|--------------------------|
| <i>Yes</i>            | 62.5%                | 15                        | 15*4=60                  |
| <i>Enough</i>         | 33.3%                | 8                         | 8*3=24                   |
| <i>Not enough</i>     | 4.2%                 | 1                         | 1*2=2                    |
| <i>Not at all</i>     | 0.0%                 | 0                         | 0*1=0                    |
| <i>Not applicable</i> | 0.0%                 | 0                         | 0*0=0                    |

| <i>Answered</i> | <i>Total score</i> | <i>Mean</i> | <i>Variance</i> | <i>SD</i> |
|-----------------|--------------------|-------------|-----------------|-----------|
| 24              | 86                 | 3.58        | 0.33            | 0.57      |

30. Have recommendations for healthcare professionals been made clear and visible?

| <i>Answer choices</i> | <i>Responses (%)</i> | <i>Responses (number)</i> | <i>Responses (score)</i> |
|-----------------------|----------------------|---------------------------|--------------------------|
| <i>Yes</i>            | 87.5%                | 21                        | 21*4=84                  |
| <i>Enough</i>         | 4.2%                 | 1                         | 1*3=3                    |
| <i>Not enough</i>     | 0.0%                 | 0                         | 0*2=0                    |
| <i>Not at all</i>     | 4.2%                 | 1                         | 1*1=1                    |
| <i>Not applicable</i> | 4.2%                 | 1                         | 1*0=0                    |

| <i>Answered</i> | <i>Total score</i> | <i>Mean</i> | <i>Variance</i> | <i>SD</i> |
|-----------------|--------------------|-------------|-----------------|-----------|
| 24              | 88                 | 3.67        | 0.97            | 0.99      |

31. If yes, or enough, have they been respected?

| <i>Answer choices</i> | <i>Responses (%)</i> | <i>Responses (number)</i> | <i>Responses (score)</i> |
|-----------------------|----------------------|---------------------------|--------------------------|
| <i>Yes</i>            | 83.3%                | 20                        | 20*4=80                  |
| <i>Enough</i>         | 4.2%                 | 1                         | 1*3=3                    |
| <i>Not enough</i>     | 0.0%                 | 0                         | 0*2=0                    |
| <i>Not at all</i>     | 4.2%                 | 1                         | 1*1=1                    |
| <i>Not applicable</i> | 8.3%                 | 2                         | 2*0=0                    |

| <i>Answered</i> | <i>Total score</i> | <i>Mean</i> | <i>Variance</i> | <i>SD</i> |
|-----------------|--------------------|-------------|-----------------|-----------|
| 24              | 84                 | 3.50        | 1.50            | 1.22      |

## TRAINING, INFORMATION AND MANAGEMENT OF HEALTH WORKERS IN THE PANDEMIC ERA

32. Have health care workers involved in care pathways/hospital wards been trained on the dressing-doffing PPE procedures?

| Answer choices | Responses (%) | Responses (number) | Responses (score)  |
|----------------|---------------|--------------------|--------------------|
| Yes            | 87.5%         | 21                 | $21 \times 4 = 84$ |
| Enough         | 4.2%          | 1                  | $1 \times 3 = 3$   |
| Not enough     | 0.0%          | 0                  | $0 \times 2 = 0$   |
| Not at all     | 0.0%          | 0                  | $0 \times 1 = 0$   |
| Not applicable | 8.3%          | 2                  | $2 \times 0 = 0$   |

| Answered | Total score | Mean | Variance | SD   |
|----------|-------------|------|----------|------|
| 24       | 87          | 3.63 | 1.23     | 1.11 |

33. Has the exposed health care personnel been periodically subjected to rhino-pharyngeal swabs to evaluate the possible positivity for SARS-CoV-2?

| Answer choices | Responses (%) | Responses (number) | Responses (score)  |
|----------------|---------------|--------------------|--------------------|
| Yes            | 87.5%         | 21                 | $21 \times 4 = 84$ |
| Enough         | 8.3%          | 2                  | $2 \times 3 = 6$   |
| Not enough     | 0.0%          | 0                  | $0 \times 2 = 0$   |
| Not at all     | 0.0%          | 0                  | $0 \times 1 = 0$   |
| Not applicable | 4.2%          | 1                  | $1 \times 0 = 0$   |

| Answered | Total score | Mean | Variance | SD   |
|----------|-------------|------|----------|------|
| 24       | 90          | 3.75 | 0.69     | 0.83 |

34. Has the staff been equipped with PPE of modulated efficiency with respect to the professional risk to which they have been exposed?

| Answer choices | Responses (%) | Responses (number) | Responses (score)  |
|----------------|---------------|--------------------|--------------------|
| Yes            | 79.2%         | 19                 | $19 \times 4 = 76$ |
| Enough         | 16.7%         | 4                  | $4 \times 3 = 12$  |
| Not enough     | 0.0%          | 0                  | $0 \times 2 = 0$   |
| Not at all     | 0.0%          | 0                  | $0 \times 1 = 0$   |
| Not applicable | 4.2%          | 1                  | $1 \times 0 = 0$   |

| Answered | Total score | Mean | Variance | SD   |
|----------|-------------|------|----------|------|
| 24       | 88          | 3.67 | 0.72     | 0.85 |

35. Have dirty paths and clean access paths to clinical departments been organized?

| Answer choices | Responses (%) | Responses (number) | Responses (score)  |
|----------------|---------------|--------------------|--------------------|
| Yes            | 41.7%         | 10                 | $10 \times 4 = 40$ |
| Enough         | 12.5%         | 3                  | $3 \times 3 = 9$   |
| Not enough     | 0.0%          | 0                  | $0 \times 2 = 0$   |
| Not at all     | 0.0%          | 0                  | $0 \times 1 = 0$   |
| Not applicable | 45.8%         | 11                 | $11 \times 0 = 0$  |

| <i>Answered</i> | <i>Total score</i> | <i>Mean</i> | <i>Variance</i> | <i>SD</i> |
|-----------------|--------------------|-------------|-----------------|-----------|
| 24              | 49                 | 2.04        | 3.62            | 1.90      |

36. Has the corporate anti-COVID vaccination program been performed using the employee booking portal?

| <i>Answer choices</i> | <i>Responses (%)</i> | <i>Responses (number)</i> | <i>Responses (score)</i> |
|-----------------------|----------------------|---------------------------|--------------------------|
| <i>Yes</i>            | 66.7%                | 16                        | 16*4=64                  |
| <i>Enough</i>         | 0.0%                 | 0                         | 0*3=0                    |
| <i>Not enough</i>     | 0.0%                 | 0                         | 0*2=0                    |
| <i>Not at all</i>     | 12.5%                | 3                         | 3*1=3                    |
| <i>Not applicable</i> | 20.8%                | 5                         | 5*0=0                    |

| <i>Answered</i> | <i>Total score</i> | <i>Mean</i> | <i>Variance</i> | <i>SD</i> |
|-----------------|--------------------|-------------|-----------------|-----------|
| 24              | 67                 | 2.79        | 3.00            | 1.73      |

37. In the company/facility, was the anti-COVID19 vaccination campaign preceded by an information campaign on the technical characteristics, methods of setting up and administering the vaccine?

| <i>Answer choices</i> | <i>Responses (%)</i> | <i>Responses (number)</i> | <i>Responses (score)</i> |
|-----------------------|----------------------|---------------------------|--------------------------|
| <i>Yes</i>            | 83.3%                | 20                        | 20*4=80                  |
| <i>Enough</i>         | 0.0%                 | 0                         | 0*3=0                    |
| <i>Not enough</i>     | 0.0%                 | 0                         | 0*2=0                    |
| <i>Not at all</i>     | 8.3%                 | 2                         | 2*1=2                    |
| <i>Not applicable</i> | 8.3%                 | 2                         | 2*0=0                    |

| <i>Answered</i> | <i>Total score</i> | <i>Mean</i> | <i>Variance</i> | <i>SD</i> |
|-----------------|--------------------|-------------|-----------------|-----------|
| 24              | 82                 | 3.42        | 1.74            | 1.32      |

## GENERAL DATA REGARDING EACH CP DIVIDED PER SECTION

### Heart Failure CP

| <i>Total score</i> | <i>Mean</i> | <i>Variance</i> | <i>SD</i> |
|--------------------|-------------|-----------------|-----------|
| 486                | 2.54        | 0.03            | 0.17      |

1. Context analysis

| <i>Total score</i> | <i>Mean</i> | <i>Variance</i> | <i>SD</i> |
|--------------------|-------------|-----------------|-----------|
| 48                 | 2.40        | 0.12            | 0.34      |

2. Patients access to care pathways/Operational Unit;

| <i>Total score</i> | <i>Mean</i> | <i>Variance</i> | <i>SD</i> |
|--------------------|-------------|-----------------|-----------|
| 48                 | 3.20        | 0.11            | 0.33      |

3. Impact on the treatment of non-COVID patients in the CPs;

| <i>Total score</i> | <i>Mean</i> | <i>Variance</i> | <i>SD</i> |
|--------------------|-------------|-----------------|-----------|
| <b>34</b>          | 2.27        | 0.35            | 0.59      |

4. Impact on the treatment of patients also SARS-COV-2 infected in the CPs;

| <i>Total score</i> | <i>Mean</i> | <i>Variance</i> | <i>SD</i> |
|--------------------|-------------|-----------------|-----------|
| <b>22</b>          | 0.88        | 0.40            | 0.63      |

5. Impact of the COVID-19 pandemic on patient management;

| <i>Total score</i> | <i>Mean</i> | <i>Variance</i> | <i>SD</i> |
|--------------------|-------------|-----------------|-----------|
| <b>71</b>          | 2.84        | 0.34            | 0.58      |

6. Structural and organizational changes of the CP/UO;

| <i>Total score</i> | <i>Mean</i> | <i>Variance</i> | <i>SD</i> |
|--------------------|-------------|-----------------|-----------|
| <b>71</b>          | 2.37        | 0.34            | 0.59      |

7. Procedures and recommendations for healthcare professionals / users;

| <i>Total score</i> | <i>Mean</i> | <i>Variance</i> | <i>SD</i> |
|--------------------|-------------|-----------------|-----------|
| <b>96</b>          | 3.20        | 0.06            | 0.24      |

8. Training, information, and management of health workers in the pandemic era.

| <i>Total score</i> | <i>Mean</i> | <i>Variance</i> | <i>SD</i> |
|--------------------|-------------|-----------------|-----------|
| <b>96</b>          | 3.20        | 0.22            | 0.47      |

### **Hereditary Breast-Ovarian Cancers CP**

| <i>Total score</i> | <i>Mean</i> | <i>Variance</i> | <i>SD</i>   |
|--------------------|-------------|-----------------|-------------|
| 852                | <b>3.19</b> | <b>0.01</b>     | <b>0.12</b> |

1. Context analysis

| <i>Total score</i> | <i>Mean</i> | <i>Variance</i> | <i>SD</i> |
|--------------------|-------------|-----------------|-----------|
| <b>84</b>          | 3.00        | 0.06            | 0.25      |

2. Patients access to care pathways/Operational Unit;

| <i>Total score</i> | <i>Mean</i> | <i>Variance</i> | <i>SD</i> |
|--------------------|-------------|-----------------|-----------|
| <b>76</b>          | 3.62        | 0.12            | 0.34      |

3. Impact on the treatment of non-COVID patients in the CPs;

| <i>Total score</i> | <i>Mean</i> | <i>Variance</i> | <i>SD</i> |
|--------------------|-------------|-----------------|-----------|
| <b>72</b>          | 3.43        | 0.10            | 0.32      |

4. Impact on the treatment of patients also SARS-COV-2 infected in the CPs;

| <i>Total score</i> | <i>Mean</i> | <i>Variance</i> | <i>SD</i> |
|--------------------|-------------|-----------------|-----------|
| <b>29</b>          | 0.83        | 0.17            | 0.41      |

5. Impact of the COVID-19 pandemic on patient management;

| <i>Total score</i> | <i>Mean</i> | <i>Variance</i> | <i>SD</i> |
|--------------------|-------------|-----------------|-----------|
| <b>117</b>         | 3.34        | 0.24            | 0.49      |

6. Structural and organizational changes of the CP/UO;

| <i>Total score</i> | <i>Mean</i> | <i>Variance</i> | <i>SD</i> |
|--------------------|-------------|-----------------|-----------|
| <b>153</b>         | 3.64        | 0.07            | 0.26      |

7. Procedures and recommendations for healthcare professionals / users;

| <i>Total score</i> | <i>Mean</i> | <i>Variance</i> | <i>SD</i> |
|--------------------|-------------|-----------------|-----------|
| <b>160</b>         | 3.81        | 0.05            | 0.21      |

8. Training, information, and management of health workers in the pandemic era.

| <i>Total score</i> | <i>Mean</i> | <i>Variance</i> | <i>SD</i> |
|--------------------|-------------|-----------------|-----------|
| <b>163</b>         | 3.88        | 0.05            | 0.22      |

### **Autism Spectrum Disorders CP**

| <i>Total score</i> | <i>Mean</i> | <i>Variance</i> | <i>SD</i> |
|--------------------|-------------|-----------------|-----------|
| <b>634</b>         | 2.81        | 0.02            | 0.14      |

1. Context analysis

| <i>Total score</i> | <i>Mean</i> | <i>Variance</i> | <i>SD</i> |
|--------------------|-------------|-----------------|-----------|
| <b>69</b>          | 2.88        | 0.11            | 0.34      |

2. Patients access to care pathways/Operational Unit;

| <i>Total score</i> | <i>Mean</i> | <i>Variance</i> | <i>SD</i> |
|--------------------|-------------|-----------------|-----------|
| <b>70</b>          | 3.89        | 0.01            | 0.10      |

3. Impact on the treatment of non-COVID patients in the CPs;

| <i>Total score</i> | <i>Mean</i> | <i>Variance</i> | <i>SD</i> |
|--------------------|-------------|-----------------|-----------|
| <b>47</b>          | 2.61        | 0.23            | 0.48      |

4. Impact on the treatment of patients also SARS-COV-2 infected in the CPs;

| <i>Total score</i> | <i>Mean</i> | <i>Variance</i> | <i>SD</i> |
|--------------------|-------------|-----------------|-----------|
| <b>23</b>          | 0.77        | 0.15            | 0.38      |

5. Impact of the COVID-19 pandemic on patient management;

| <i>Total score</i> | <i>Mean</i> | <i>Variance</i> | <i>SD</i> |
|--------------------|-------------|-----------------|-----------|
| <b>98</b>          | 3.27        | 0.20            | 0.45      |

6. Structural and organizational changes of the CP/UO;

| <i>Total score</i> | <i>Mean</i> | <i>Variance</i> | <i>SD</i> |
|--------------------|-------------|-----------------|-----------|
| <b>115</b>         | 3.19        | 0.15            | 0.39      |

7. Procedures and recommendations for healthcare professionals / users;

| <i>Total score</i> | <i>Mean</i> | <i>Variance</i> | <i>SD</i> |
|--------------------|-------------|-----------------|-----------|
| <b>127</b>         | 3.53        | 0.07            | 0.27      |

8. Training, information, and management of health workers in the pandemic era.

| <i>Total score</i> | <i>Mean</i> | <i>Variance</i> | <i>SD</i> |
|--------------------|-------------|-----------------|-----------|
| <b>85</b>          | 2.36        | 0.32            | 0.56      |

## Diabetes CP

| <i>Total score</i> | <i>Mean</i> | <i>Variance</i> | <i>SD</i> |
|--------------------|-------------|-----------------|-----------|
| <b>660</b>         | 2.90        | 0.06            | 0.25      |

1. Context analysis

| <i>Total score</i> | <i>Mean</i> | <i>Variance</i> | <i>SD</i> |
|--------------------|-------------|-----------------|-----------|
| <b>54</b>          | 2.25        | 0.38            | 0.61      |

2. Patients access to care pathways/Operational Unit;

| <i>Total score</i> | <i>Mean</i> | <i>Variance</i> | <i>SD</i> |
|--------------------|-------------|-----------------|-----------|
| <b>72</b>          | 4.00        | 0.67            | 0.82      |

3. Impact on the treatment of non-COVID patients in the CPs;

| <i>Total score</i> | <i>Mean</i> | <i>Variance</i> | <i>SD</i> |
|--------------------|-------------|-----------------|-----------|
| <b>52</b>          | 2.89        | 0.48            | 0.69      |

4. Impact on the treatment of patients also SARS-COV-2 infected in the CPs;

| <i>Total score</i> | <i>Mean</i> | <i>Variance</i> | <i>SD</i> |
|--------------------|-------------|-----------------|-----------|
| <b>20</b>          | 0.67        | 0.11            | 0.33      |

5. Impact of the COVID-19 pandemic on patient management;

| <i>Total score</i> | <i>Mean</i> | <i>Variance</i> | <i>SD</i> |
|--------------------|-------------|-----------------|-----------|
| <b>87</b>          | 2.90        | 0.48            | 0.70      |

6. Structural and organizational changes of the CP/UO;

| <i>Total score</i> | <i>Mean</i> | <i>Variance</i> | <i>SD</i> |
|--------------------|-------------|-----------------|-----------|
| <b>115</b>         | 3.19        | 0.53            | 0.73      |

7. Procedures and recommendations for healthcare professionals / users;

| <i>Total score</i> | <i>Mean</i> | <i>Variance</i> | <i>SD</i> |
|--------------------|-------------|-----------------|-----------|
| <b>143</b>         | 3.97        | 0.66            | 0.81      |

8. Training, information, and management of health workers in the pandemic era.

| <i>Total score</i> | <i>Mean</i> | <i>Variance</i> | <i>SD</i> |
|--------------------|-------------|-----------------|-----------|
| <b>119</b>         | 3.31        | 0.55            | 0.74      |
