# Supplementary material for: Impact of the COVID-19 Pandemic on Clinical Pathways for Non-SARS-CoV-2 Related Diseases in the Lazio Region, Italy
Source: MDPI journal article supplement (doi:10.3390/ijerph19020635), 2022-01-06
Supplement: s1 [file s1]

**Table S2: Clinical Pathways' data**

**S2a: HEART FAILURE**

| COVID SURVEY                                                                         |                                                                                                                                                  | CLINICAL PATHWAY |       |       |       |
|--------------------------------------------------------------------------------------|--------------------------------------------------------------------------------------------------------------------------------------------------|------------------|-------|-------|-------|
|                                                                                      |                                                                                                                                                  | HEART FAILURE    |       |       |       |
| CONTEXT ANALYSIS                                                                     | During the COVID-19 pandemic, did patients accept treatment despite the fear of contagion?                                                       | 20,0%            | 60,0% |       | 20,0% |
|                                                                                      | Compared to the same period of the previous year, during the first wave of the pandemic, did the number of accesses remain stable?               | 60,0%            |       | 20,0% | 20,0% |
|                                                                                      | Compared to the the first wave of the pandemic, did the number of patients undertaking the care pathways remained stable during the second wave? | 80,0%            |       |       | 20,0% |
|                                                                                      | Has the volume of procedures remained stable during first and second waves compared to the same period of the previous year?                     | 20,0%            | 60,0% |       | 20,0% |
| PATIENTS ACCESS TO CP/ UO                                                            | Do you use a pre-triage module during treatment?                                                                                                 | 60,0%            |       | 40,0% |       |
|                                                                                      | Are security measures taken?                                                                                                                     | 60,0%            |       | 40,0% |       |
|                                                                                      | Are social distancing measures taken?                                                                                                            | 60,0%            |       | 20,0% | 20,0% |
|                                                                                      |                                                                                                                                                  |                  |       |       |       |
| IMPACT ON THE TREATMENT OF NON-COVID PATIENTS IN THE CLINICAL                        | Was the start of the treatment within the care pathway guaranteed to the patients anyway?                                                        | 80,0%            |       |       | 20,0% |
|                                                                                      | Have the cancelled visits been rescheduled and recovered?                                                                                        | 20,0%            | 20,0% | 20,0% | 40,0% |
|                                                                                      | Has remote monitoring been activated for patients who could not interrupt the treatment path (telemedicine)?                                     | 20,0%            | 20,0% | 20,0% | 40,0% |
| IMPACT ON THE TREATMENT OF PATIENTS ALSO SARS COV-2 INFECTED IN THE CLINICAL PATHWAY | Have you treated patients affected by COVID-19 within the care pathway/hospital ward?                                                            | 40,0%            |       | 40,0% | 20,0% |
|                                                                                      | If yes or enough: in hospital in COVID wards?                                                                                                    | 100,0%           |       |       |       |
|                                                                                      | If yes or enough: was it in COVID wards with telephone counselling?                                                                              | 100,0%           |       |       |       |
|                                                                                      | Have the clinical-assistance paths for COVID and NON_COVID patients been separated?                                                              | 80,0%            |       |       | 20,0% |
|                                                                                      |                                                                                                                                                  |                  |       |       |       |
| IMPACT OF THE COVID-19 PANDEMIC ON PATIENT MANAGEMENT                                | Have ad hoc organizational solutions been implemented for patient management with respect to the pre-pandemic era?                               | 60,0%            |       | 20,0% | 20,0% |
|                                                                                      | Has therapeutic continuity been ensured within the pathway care?                                                                                 | 80,0%            |       |       | 20,0% |
|                                                                                      | Have technological solutions, such as telemedicine, been adopted for patient follow-up?                                                          | 20,0%            | 40,0% | 40,0% |       |
|                                                                                      | Did all hospitalized patients repeat the screening test for SARS-Cov-2 several times during the hospitalization period?                          | 60,0%            |       | 20,0% | 20,0% |
|                                                                                      | Has the correct use of PPE (personal protective equipment) by healthcare professionals and patients been monitored?                              | 80,0%            |       |       | 20,0% |
|                                                                                      |                                                                                                                                                  |                  |       |       |       |

|                                                                            |                                                                                                                                                                                               |                                                                                                                     |       |       |       |
|----------------------------------------------------------------------------|-----------------------------------------------------------------------------------------------------------------------------------------------------------------------------------------------|---------------------------------------------------------------------------------------------------------------------|-------|-------|-------|
| STRUCTURAL AND ORGANIZATIONAL CHANGES OF THE CP/UO                         | Has the care pathway/hospital ward remained unchanged from an organizational point of view?                                                                                                   | 40,0%                                                                                                               | 20,0% | 20,0% | 20,0% |
|                                                                            | Have outpatient and/or surgical activities been guaranteed?                                                                                                                                   | 60,0%                                                                                                               |       | 20,0% | 20,0% |
|                                                                            | Has the timing of the transition of a patient from one care setting to another within the care pathway/hospital ward been respected?                                                          | 20,0%                                                                                                               | 20,0% | 20,0% | 40,0% |
|                                                                            | Have there been multidisciplinary discussions about the patients' health conditions?                                                                                                          | 40,0%                                                                                                               | 20,0% |       | 40,0% |
|                                                                            | Have structural changes been made to encourage social distancing?                                                                                                                             | 60,0%                                                                                                               | 20,0% | 20,0% |       |
|                                                                            | Have the services relating to non-deferrable diseases been guaranteed?                                                                                                                        | 80,0%                                                                                                               |       | 20,0% |       |
|                                                                            |                                                                                                                                                                                               |                                                                                                                     |       |       |       |
| PROCEDURES AND RECOMMENDATIONS FOR HEALTHCARE PROFESSIONALS / USERS        | Have recommendations for the patients been made clear and visible?                                                                                                                            | 40,0%                                                                                                               | 40,0% | 20,0% |       |
|                                                                            | If yes, or enough, have they been respected?                                                                                                                                                  | 20,0%                                                                                                               | 80,0% |       |       |
|                                                                            | Have recommendations for relatives been made clear and visible?                                                                                                                               | 60,0%                                                                                                               | 20,0% | 20,0% |       |
|                                                                            | If yes, or enough, have they been respected?                                                                                                                                                  | 40,0%                                                                                                               | 60,0% |       |       |
|                                                                            | Have the recommendations been made clear and visible to healthcare professionals?                                                                                                             | 60,0%                                                                                                               | 20,0% | 20,0% |       |
|                                                                            | If yes, or enough, have they been respected?                                                                                                                                                  | 60,0%                                                                                                               | 20,0% | 20,0% |       |
|                                                                            |                                                                                                                                                                                               |                                                                                                                     |       |       |       |
| TRAINING, INFORMATION AND MANAGEMENT OF HEALTH WORKERS IN THE PANDEMIC ERA | Have health care workers involved in care pathways/hospital wards been trained on the dressing-doffing PPE procedures?                                                                        | 80,0%                                                                                                               | 20,0% |       |       |
|                                                                            | Has the exposed health care personnel been periodically subjected to rhino-pharyngeal swabs to evaluate the possible positivity for SARS-CoV-2?                                               | 60,0%                                                                                                               | 40,0% |       |       |
|                                                                            | Has the staff been equipped with PPE of modulated efficiency with respect to the professional risk to which they have been exposed?                                                           | 80,0%                                                                                                               | 20,0% |       |       |
|                                                                            | Have dirty paths and clean access paths to clinical departments been organized?                                                                                                               | 40,0%                                                                                                               | 60,0% |       |       |
|                                                                            | Has the corporate anti-COVID vaccination program been performed using the employee booking portal?                                                                                            | 40,0%                                                                                                               | 40,0% | 20,0% |       |
|                                                                            | In the company/facility, was the anti-COVID19 vaccination campaign preceded by an information campaign on the technical characteristics, methods of setting up and administering the vaccine? | 60,0%                                                                                                               | 20,0% | 20,0% |       |
|                                                                            |                                                                                                                                                                                               | <div> <div>Yes</div> <div>enough</div> <div>not enough</div> <div>Not at all</div> <div>Not applicable</div> </div> |       |       |       |

## S2b: HEREDITARY BREAST AND OVARIAN CANCER

| COVID SURVEY                                                                         |                                                                                                                                                  | CLINICAL PATHWAY                     |       |       |       |       |
|--------------------------------------------------------------------------------------|--------------------------------------------------------------------------------------------------------------------------------------------------|--------------------------------------|-------|-------|-------|-------|
|                                                                                      |                                                                                                                                                  | HEREDITARY BREAST AND OVARIAN CANCER |       |       |       |       |
| CONTEXT ANALYSIS                                                                     | During the COVID-19 pandemic, did patients accept treatment despite the fear of contagion?                                                       | 28,6%                                | 42,9% |       | 14,3% | 14,3% |
|                                                                                      | Compared to the same period of the previous year, during the first wave of the pandemic, did the number of accesses remain stable?               | 14,3%                                | 42,9% |       | 28,6% | 14,3% |
|                                                                                      | Compared to the the first wave of the pandemic, did the number of patients undertaking the care pathways remained stable during the second wave? | 85,7%                                |       |       |       | 14,3% |
|                                                                                      | Has the volume of procedures remained stable during first and second waves compared to the same period of the previous year?                     | 42,9%                                |       | 28,6% | 28,6% |       |
|                                                                                      |                                                                                                                                                  |                                      |       |       |       |       |
| PATIENTS ACCESS TO CP/ UO                                                            | Do you use a pre-triage module during treatment?                                                                                                 | 71,4%                                |       |       | 14,3% | 14,3% |
|                                                                                      | Are security measures taken?                                                                                                                     | 100,0%                               |       |       |       |       |
|                                                                                      | Are social distancing measures taken?                                                                                                            | 85,7%                                |       |       |       | 14,3% |
|                                                                                      |                                                                                                                                                  |                                      |       |       |       |       |
| IMPACT ON THE TREATMENT OF NON-COVID PATIENTS IN THE CLINICAL PATHWAY                | Was the start of the treatment within the care pathway guaranteed to the patients anyway?                                                        | 85,7%                                |       |       |       | 14,3% |
|                                                                                      | Have the cancelled visits been rescheduled and recovered?                                                                                        | 85,7%                                |       |       |       | 14,3% |
|                                                                                      | Has remote monitoring been activated for patients who could not interrupt the treatment path (telemedicine)?                                     | 28,6%                                | 28,6% | 14,3% | 28,6% |       |
|                                                                                      |                                                                                                                                                  |                                      |       |       |       |       |
| IMPACT ON THE TREATMENT OF PATIENTS ALSO SARS COV-2 INFECTED IN THE CLINICAL PATHWAY | Have you treated patients affected by COVID-19 within the care pathway/hospital ward?                                                            | 14,3%                                | 42,9% |       | 42,9% |       |
|                                                                                      | If yes or enough: in hospital in COVID wards?                                                                                                    | 14,3%                                | 85,7% |       |       |       |
|                                                                                      | If yes or enough: was it in COVID wards with telephone counselling?                                                                              | 14,3%                                | 85,7% |       |       |       |
|                                                                                      | Have the clinical-assistance paths for COVID and NON_COVID patients been separated?                                                              | 57,1%                                |       | 14,3% | 28,6% |       |
|                                                                                      |                                                                                                                                                  |                                      |       |       |       |       |
| IMPACT OF THE COVID-19 PANDEMIC ON PATIENT MANAGEMENT                                | Have ad hoc organizational solutions been implemented for patient management with respect to the pre-pandemic era?                               | 100,0%                               |       |       |       |       |
|                                                                                      | Has therapeutic continuity been ensured within the pathway care?                                                                                 | 100,0%                               |       |       |       |       |
|                                                                                      | Have technological solutions, such as telemedicine, been adopted for patient follow-up?                                                          | 14,3%                                | 14,3% | 42,9% |       | 28,6% |
|                                                                                      | Did all hospitalized patients repeat the screening test for SARS-Cov-2 several times during the hospitalization period?                          | 85,7%                                |       |       |       | 14,3% |
|                                                                                      | Has the correct use of PPE (personal protective equipment) by healthcare professionals and patients been monitored?                              | 85,7%                                |       |       |       | 14,3% |
|                                                                                      |                                                                                                                                                  |                                      |       |       |       |       |

|                                                                               |                                                                                                                                                                                               |                                                                                                                     |       |       |
|-------------------------------------------------------------------------------|-----------------------------------------------------------------------------------------------------------------------------------------------------------------------------------------------|---------------------------------------------------------------------------------------------------------------------|-------|-------|
| STRUCTURAL AND ORGANIZATIONAL CHANGES<br>OF THE CP/UO                         | Has the care pathway/hospital ward remained unchanged from an organizational point of view ?                                                                                                  | 57,1%                                                                                                               | 28,6% | 14,3% |
|                                                                               | Have outpatient and/or surgical activities been guaranteed?                                                                                                                                   | 71,4%                                                                                                               | 28,6% |       |
|                                                                               | Has the timing of the transition of a patient from one care setting to another within the care pathway/hospital ward been respected?                                                          | 71,4%                                                                                                               | 28,6% |       |
|                                                                               | Have there been multidisciplinary discussions about the patients' health conditions?                                                                                                          | 85,7%                                                                                                               |       | 14,3% |
|                                                                               | Have structural changes been made to encourage social distancing?                                                                                                                             | 71,4%                                                                                                               | 14,3% | 14,3% |
|                                                                               | Have the services relating to non-deferrable diseases been guaranteed?                                                                                                                        | 85,7%                                                                                                               |       | 14,3% |
|                                                                               |                                                                                                                                                                                               |                                                                                                                     |       |       |
| PROCEDURES AND RECOMMENDATIONS FOR<br>HEALTHCARE PROFESSIONALS / USERS        | Have recommendations for the patients been made clear and visible?                                                                                                                            | 100,0%                                                                                                              |       |       |
|                                                                               | If yes, or enough, have they been respected?                                                                                                                                                  | 71,4%                                                                                                               | 28,6% |       |
|                                                                               | Have recommendations for relatives been made clear and visible?                                                                                                                               | 100,0%                                                                                                              |       |       |
|                                                                               | If yes, or enough, have they been respected?                                                                                                                                                  | 71,4%                                                                                                               | 28,6% |       |
|                                                                               | Have the recommendations been made clear and visible to healthcare professionals?                                                                                                             | 100,0%                                                                                                              |       |       |
|                                                                               | If yes, or enough, have they been respected?                                                                                                                                                  | 85,7%                                                                                                               |       | 14,3% |
|                                                                               |                                                                                                                                                                                               |                                                                                                                     |       |       |
| TRAINING, INFORMATION AND MANAGEMENT OF<br>HEALTH WORKERS IN THE PANDEMIC ERA | Have health care workers involved in care pathways/hospital wards been trained on the dressing-doffing PPE procedures?                                                                        | 100,0%                                                                                                              |       |       |
|                                                                               | Has the exposed health care personnel been periodically subjected to rhino-pharyngeal swabs to evaluate the possible positivity for SARS-CoV-2?                                               | 100,0%                                                                                                              |       |       |
|                                                                               | Has the staff been equipped with PPE of modulated efficiency with respect to the professional risk to which they have been exposed?                                                           | 85,7%                                                                                                               |       | 14,3% |
|                                                                               | Have dirty paths and clean access paths to clinical departments been organized?                                                                                                               | 85,7%                                                                                                               |       | 14,3% |
|                                                                               | Has the corporate anti-COVID vaccination program been performed using the employee booking portal?                                                                                            | 100,0%                                                                                                              |       |       |
|                                                                               | In the company/facility, was the anti-COVID19 vaccination campaign preceded by an information campaign on the technical characteristics, methods of setting up and administering the vaccine? | 100,0%                                                                                                              |       |       |
|                                                                               |                                                                                                                                                                                               |                                                                                                                     |       |       |
|                                                                               |                                                                                                                                                                                               | <div> <div>Yes</div> <div>enough</div> <div>not enough</div> <div>Not at all</div> <div>Not applicable</div> </div> |       |       |

## S2c: AUTISM SPECTRUM DISORDER

| COVID SURVEY                                                                                  |                                                                                                                                                   | CLINICAL PATHWAY         |       |       |       |
|-----------------------------------------------------------------------------------------------|---------------------------------------------------------------------------------------------------------------------------------------------------|--------------------------|-------|-------|-------|
|                                                                                               |                                                                                                                                                   | AUTISM SPECTRUM DISORDER |       |       |       |
| CONTEXT ANALYSIS                                                                              | During the COVID-19 pandemic, did patients accept treatment despite the fear of contagion?                                                        | 66,7%                    |       | 33,3% |       |
|                                                                                               | Compared to the same period of the previous year, during the first w ave of the pandemic, did the number of accesses remain stable?               | 16,7%                    | 66,7% |       | 16,7% |
|                                                                                               | Compared to the the first w ave of the pandemic, did the number of patients undertaking the care pathways remained stable during the second wave? | 50,0%                    |       | 16,7% | 16,7% |
|                                                                                               | Has the volume of procedures remained stable during first and second waves compared to the same period of the previous year?                      | 66,7%                    |       | 16,7% | 16,7% |
| PATIENTS ACCESS TO CP/<br>UO                                                                  |                                                                                                                                                   |                          |       |       |       |
|                                                                                               | Do you use a pre-triage module during treatment?                                                                                                  | 100,0%                   |       |       |       |
|                                                                                               | Are security measures taken?                                                                                                                      | 100,0%                   |       |       |       |
|                                                                                               | Are social distancing measures taken?                                                                                                             | 66,7%                    |       | 33,3% |       |
| IMPACT ON THE<br>TREATMENT OF NON-<br>COVID PATIENTS IN THE<br>CLINICAL PATHWAY               |                                                                                                                                                   |                          |       |       |       |
|                                                                                               | Was the start of the treatment within the care pathway guaranteed to the patients anyway?                                                         | 83,3%                    |       |       | 16,7% |
|                                                                                               | Have the cancelled visits been rescheduled and recovered?                                                                                         | 33,3%                    | 33,3% | 33,3% |       |
|                                                                                               | Has remote monitoring been activated for patients who could not interrupt the treatment path (telemedicine)?                                      | 16,7%                    | 33,3% | 50,0% |       |
| IMPACT ON THE TREATMENT OF<br>PATIENTS ALSO SARS COV-2<br>INFECTED IN THE CLINICAL<br>PATHWAY |                                                                                                                                                   |                          |       |       |       |
|                                                                                               | Have you treated patients affected by COVID-19 within the care pathway/hospital ward?                                                             | 100,0%                   |       |       |       |
|                                                                                               | If yes or enough: in hospital in COVID wards?                                                                                                     | 33,3%                    | 66,7% |       |       |
|                                                                                               | If yes or enough: was it in COVID wards with telephone counselling?                                                                               | 33,3%                    | 66,7% |       |       |
|                                                                                               | Have the clinical-assistance paths for COVID and NON_COVID patients been separated?                                                               | 50,0%                    |       | 16,7% | 33,3% |
| IMPACT OF THE COVID-19 PANDEMIC ON<br>PATIENT MANAGEMENT                                      |                                                                                                                                                   |                          |       |       |       |
|                                                                                               | Have ad hoc organizational solutions been implemented for patient management with respect to the pre-pandemic era?                                | 83,3%                    |       |       | 16,7% |
|                                                                                               | Has therapeutic continuity been ensured within the pathway care?                                                                                  | 83,3%                    |       |       | 16,7% |
|                                                                                               | Have technological solutions, such as telemedicine, been adopted for patient follow-up?                                                           | 50,0%                    |       | 33,3% | 16,7% |
|                                                                                               | Did all hospitalized patients repeat the screening test for SARS-Cov-2 several times during the hospitalization period?                           | 33,3%                    | 16,7% | 50,0% |       |
|                                                                                               | Has the correct use of PPE (personal protective equipment) by healthcare professionals and patients been monitored?                               | 100,0%                   |       |       |       |
|                                                                                               |                                                                                                                                                   |                          |       |       |       |

|                                                                            |                                                                                                                                                                                               |        |        |       |       |
|----------------------------------------------------------------------------|-----------------------------------------------------------------------------------------------------------------------------------------------------------------------------------------------|--------|--------|-------|-------|
| STRUCTURAL AND ORGANIZATIONAL CHANGES OF THE CP/UO                         | Has the care pathway/hospital ward remained unchanged from an organizational point of view ?                                                                                                  | 16,7%  | 66,7%  |       | 16,7% |
|                                                                            | Have outpatient and/or surgical activities been guaranteed?                                                                                                                                   | 50,0%  |        | 33,3% | 16,7% |
|                                                                            | Has the timing of the transition of a patient from one care setting to another within the care pathway/hospital ward been respected?                                                          | 33,3%  | 50,0%  |       | 16,7% |
|                                                                            | Have there been multidisciplinary discussions about the patients' health conditions?                                                                                                          | 83,3%  |        |       | 16,7% |
|                                                                            | Have structural changes been made to encourage social distancing?                                                                                                                             | 50,0%  |        | 33,3% | 16,7% |
|                                                                            | Have the services relating to non-deferrable diseases been guaranteed?                                                                                                                        | 100,0% |        |       |       |
|                                                                            |                                                                                                                                                                                               |        |        |       |       |
| PROCEDURES AND RECOMMENDATIONS FOR HEALTHCARE PROFESSIONALS / USERS        | Have recommendations for the patients been made clear and visible?                                                                                                                            | 100,0% |        |       |       |
|                                                                            | If yes, or enough, have they been respected?                                                                                                                                                  | 33,3%  | 66,7%  |       |       |
|                                                                            | Have recommendations for relatives been made clear and visible?                                                                                                                               | 100,0% |        |       |       |
|                                                                            | If yes, or enough, have they been respected?                                                                                                                                                  | 33,3%  | 50,0%  |       | 16,7% |
|                                                                            | Have the recommendations been made clear and visible to healthcare professionals?                                                                                                             | 83,3%  |        |       | 16,7% |
|                                                                            |                                                                                                                                                                                               | 83,3%  |        |       | 16,7% |
|                                                                            | If yes, or enough, have they been respected?                                                                                                                                                  |        |        |       |       |
|                                                                            |                                                                                                                                                                                               |        |        |       |       |
| TRAINING, INFORMATION AND MANAGEMENT OF HEALTH WORKERS IN THE PANDEMIC ERA | Have health care workers involved in care pathways/hospital wards been trained on the dressing-doffing PPE procedures?                                                                        | 66,7%  |        | 33,3% |       |
|                                                                            | Has the exposed health care personnel been periodically subjected to rhino- pharyngeal swabs to evaluate the possible positivity for SARS-CoV-2?                                              | 83,3%  |        |       | 16,7% |
|                                                                            | Has the staff been equipped with PPE of modulated efficiency with respect to the professional risk to which they have been exposed?                                                           | 66,7%  |        | 16,7% | 16,7% |
|                                                                            | Have dirty paths and clean access paths to clinical departments been organized?                                                                                                               | 33,33% | 66,67% |       |       |
|                                                                            | Has the corporate anti-COVID vaccination program been performed using the employee booking portal?                                                                                            | 16,7%  | 16,7%  | 66,7% |       |
|                                                                            | In the company/facility, was the anti-COVID19 vaccination campaign preceded by an information campaign on the technical characteristics, methods of setting up and administering the vaccine? | 66,7%  |        | 16,7% | 16,7% |
|                                                                            |                                                                                                                                                                                               |        |        |       |       |
|                                                                            |                                                                                                                                                                                               |        |        |       |       |
|                                                                            | <div><div>Yes</div><div>enough</div><div>not enough</div><div>Not at all</div><div>Not applicable</div></div>                                                                                 |        |        |       |       |

## S2d: DIABETES

| COVID SURVEY                                                                         |                                                                                                                                                  | CLINICAL PATHWAY |       |       |       |       |
|--------------------------------------------------------------------------------------|--------------------------------------------------------------------------------------------------------------------------------------------------|------------------|-------|-------|-------|-------|
|                                                                                      |                                                                                                                                                  | DIABETES         |       |       |       |       |
| CONTEXT ANALYSIS                                                                     | During the COVID-19 pandemic, did patients accept treatment despite the fear of contagion?                                                       | 16,7%            | 66,7% |       | 16,7% |       |
|                                                                                      | Compared to the same period of the previous year, during the first wave of the pandemic, did the number of accesses remain stable?               | 100,0%           |       |       |       |       |
|                                                                                      | Compared to the the first wave of the pandemic, did the number of patients undertaking the care pathways remained stable during the second wave? | 100,0%           |       |       |       |       |
|                                                                                      | Has the volume of procedures remained stable during first and second waves compared to the same period of the previous year?                     | 100,0%           |       |       |       |       |
| PATIENTS ACCESS TO CP/<br>UO                                                         |                                                                                                                                                  |                  |       |       |       |       |
|                                                                                      | Do you use a pre-triage module during treatment?                                                                                                 | 100,0%           |       |       |       |       |
|                                                                                      | Are security measures taken?                                                                                                                     | 100,0%           |       |       |       |       |
|                                                                                      | Are social distancing measures taken?                                                                                                            | 100,0%           |       |       |       |       |
| IMPACT ON THE TREATMENT OF NON-COVID PATIENTS IN THE CLINICAL                        |                                                                                                                                                  |                  |       |       |       |       |
|                                                                                      | Was the start of the treatment within the care pathway guaranteed to the patients anyway?                                                        | 16,7%            | 50,0% |       | 16,7% | 16,7% |
|                                                                                      | Have the cancelled visits been rescheduled and recovered?                                                                                        | 83,3%            |       |       | 16,7% |       |
|                                                                                      | Has remote monitoring been activated for patients who could not interrupt the treatment path (telemedicine)?                                     | 83,3%            |       |       | 16,7% |       |
| IMPACT ON THE TREATMENT OF PATIENTS ALSO SARS COV-2 INFECTED IN THE CLINICAL PATHWAY |                                                                                                                                                  |                  |       |       |       |       |
|                                                                                      | Have you treated patients affected by COVID-19 within the care pathway/hospital ward?                                                            | 16,7%            | 16,7% | 33,3% | 33,3% |       |
|                                                                                      | If yes or enough: in hospital in COVID wards?                                                                                                    | 16,7%            | 83,3% |       |       |       |
|                                                                                      | If yes or enough: was it in COVID wards with telephone counselling?                                                                              | 16,7%            | 16,7% | 66,7% |       |       |
|                                                                                      | Have the clinical-assistance paths for COVID and NON_COVID patients been separated?                                                              | 16,7%            | 16,7% | 66,7% |       |       |
| IMPACT OF THE COVID-19 PANDEMIC ON PATIENT MANAGEMENT                                |                                                                                                                                                  |                  |       |       |       |       |
|                                                                                      | Have ad hoc organizational solutions been implemented for patient management with respect to the pre-pandemic era?                               | 100,0%           |       |       |       |       |
|                                                                                      | Has therapeutic continuity been ensured within the pathway care?                                                                                 | 66,7%            |       | 33,3% |       |       |
|                                                                                      | Have technological solutions, such as telemedicine, been adopted for patient follow-up?                                                          | 83,3%            |       |       | 16,7% |       |
|                                                                                      | Did all hospitalized patients repeat the screening test for SARS-Cov-2 several times during the hospitalization period?                          | 100,0%           |       |       |       |       |
|                                                                                      | Has the correct use of PPE (personal protective equipment) by healthcare professionals and patients been monitored?                              | 100,0%           |       |       |       |       |
|                                                                                      |                                                                                                                                                  |                  |       |       |       |       |

|                                                                            |                                                                                                                                                                                               |                                                                                                                     |       |       |
|----------------------------------------------------------------------------|-----------------------------------------------------------------------------------------------------------------------------------------------------------------------------------------------|---------------------------------------------------------------------------------------------------------------------|-------|-------|
| STRUCTURAL AND ORGANIZATIONAL CHANGES OF THE CP/UO                         | Has the care pathway/hospital ward remained unchanged from an organizational point of view?                                                                                                   | 83,3%                                                                                                               |       | 16,7% |
|                                                                            | Have outpatient and/or surgical activities been guaranteed?                                                                                                                                   | 50,0%                                                                                                               | 33,3% | 16,7% |
|                                                                            | Has the timing of the transition of a patient from one care setting to another within the care pathway/hospital ward been respected?                                                          | 16,7%                                                                                                               | 66,7% | 16,7% |
|                                                                            | Have there been multidisciplinary discussions about the patients' health conditions?                                                                                                          | 16,7%                                                                                                               | 50,0% | 16,7% |
|                                                                            | Have structural changes been made to encourage social distancing?                                                                                                                             | 100,0%                                                                                                              |       |       |
|                                                                            | Have the services relating to non-deferrable diseases been guaranteed?                                                                                                                        | 66,7%                                                                                                               | 16,7% | 16,7% |
|                                                                            |                                                                                                                                                                                               |                                                                                                                     |       |       |
| PROCEDURES AND RECOMMENDATIONS FOR HEALTHCARE PROFESSIONALS / USERS        | Have recommendations for the patients been made clear and visible?                                                                                                                            | 100,0%                                                                                                              |       |       |
|                                                                            | If yes, or enough, have they been respected?                                                                                                                                                  | 83,3%                                                                                                               |       | 16,7% |
|                                                                            | Have recommendations for relatives been made clear and visible?                                                                                                                               | 100,0%                                                                                                              |       |       |
|                                                                            | If yes, or enough, have they been respected?                                                                                                                                                  | 100,0%                                                                                                              |       |       |
|                                                                            | Have the recommendations been made clear and visible to healthcare professionals?                                                                                                             | 100,0%                                                                                                              |       |       |
|                                                                            | If yes, or enough, have they been respected?                                                                                                                                                  | 100,0%                                                                                                              |       |       |
|                                                                            |                                                                                                                                                                                               |                                                                                                                     |       |       |
| TRAINING, INFORMATION AND MANAGEMENT OF HEALTH WORKERS IN THE PANDEMIC ERA | Have health care workers involved in care pathways/hospital wards been trained on the dressing-doffing PPE procedures?                                                                        | 100,0%                                                                                                              |       |       |
|                                                                            | Has the exposed health care personnel been periodically subjected to rhino-pharyngeal swabs to evaluate the possible positivity for SARS-CoV-2?                                               | 100,0%                                                                                                              |       |       |
|                                                                            | Has the staff been equipped with PPE of modulated efficiency with respect to the professional risk to which they have been exposed?                                                           | 83,3%                                                                                                               |       | 16,7% |
|                                                                            | Have dirty paths and clean access paths to clinical departments been organized?                                                                                                               | 100,0%                                                                                                              |       |       |
|                                                                            | Has the corporate anti-COVID vaccination program been performed using the employee booking portal?                                                                                            | 100,0%                                                                                                              |       |       |
|                                                                            | In the company/facility, was the anti-COVID19 vaccination campaign preceded by an information campaign on the technical characteristics, methods of setting up and administering the vaccine? | 100,0%                                                                                                              |       |       |
|                                                                            |                                                                                                                                                                                               |                                                                                                                     |       |       |
|                                                                            |                                                                                                                                                                                               | <div> <div>Yes</div> <div>enough</div> <div>not enough</div> <div>Not at all</div> <div>Not applicable</div> </div> |       |       |
